# Supplementary material for: Two complexes of copper(ii) salts with 5-amino-3-(pyrid-2-yl)-1H-pyrazole, the prototype for a new class of ditopic ligand
Source: Royal Society of Chemistry journal article supplement (doi:10.1039/b514634h), 2005-11-08
Supplement: b514634h.pdf [file b514634h.pdf]

# Two Complexes of Copper(II) Salts with 5-Amino-3-(pyrid-2-yl)-1H-pyrazole, the Prototype for a New Class of Ditopic Ligand

Christopher M. Pask<sup>a</sup>, Kenneth D. Camm<sup>a</sup>, Neil J. Bullen<sup>a</sup>, Michael J. Carr<sup>a</sup>, William Clegg<sup>b</sup>, Colin A. Kilner<sup>a</sup> and Malcolm A. Halcrow<sup>a,\*</sup>

<sup>a</sup>*School of Chemistry, University of Leeds, Woodhouse Lane, Leeds, U.K. LS2 9JT.*

*Email: M.A.Halcrow@leeds.ac.uk*

<sup>b</sup>*School of Natural Sciences, Bedson Building, University of Newcastle upon Tyne, Newcastle upon Tyne, U.K. NE1 7RU.*

## Supplementary Information

**Fig. S1** Views of the complex cations in the crystal structures of [CuBrL<sub>2</sub>]Br·CH<sub>3</sub>OH (**1**) and [CuL<sub>2</sub>(OH<sub>2</sub>)]SO<sub>4</sub>·H<sub>2</sub>O·CH<sub>3</sub>OH (**2**), emphasising their different molecular structures.

**Table S1** Selected bond lengths and angles for [CuBrL<sub>2</sub>]Br·CH<sub>3</sub>OH (**1**) and [CuL<sub>2</sub>(OH<sub>2</sub>)]SO<sub>4</sub>·H<sub>2</sub>O·CH<sub>3</sub>OH (**2**).

**Table S2** Metric parameters for the hydrogen bond and π-π interactions in [CuBrL<sub>2</sub>]Br·CH<sub>3</sub>OH (**1**).

**Table S3** Metric parameters for the hydrogen bond and π-π interactions in [CuL<sub>2</sub>(OH<sub>2</sub>)]SO<sub>4</sub>·H<sub>2</sub>O·CH<sub>3</sub>OH (**2**).

**Table S4** Connections making up the hydrogen-bonded network in [CuBrL<sub>2</sub>]Br·CH<sub>3</sub>OH (**1**).

**Table S5** Connections making up the hydrogen-bonded network in [CuL<sub>2</sub>(OH<sub>2</sub>)]SO<sub>4</sub>·H<sub>2</sub>O·CH<sub>3</sub>OH (**2**).

**Fig. S2** Two views of the topology of the extended hydrogen-bonded network in [CuBrL<sub>2</sub>]Br·CH<sub>3</sub>OH (**1**).

**Fig. S3** Two views of the topology of the extended hydrogen-bonded network in [CuL<sub>2</sub>(OH<sub>2</sub>)]SO<sub>4</sub>·H<sub>2</sub>O·CH<sub>3</sub>OH (**2**).

**Fig. S4** Diagram showing the relationship between the network topology for [CuL<sub>2</sub>(OH<sub>2</sub>)]SO<sub>4</sub>·H<sub>2</sub>O·CH<sub>3</sub>OH (**2**) and the boron nitride structure.

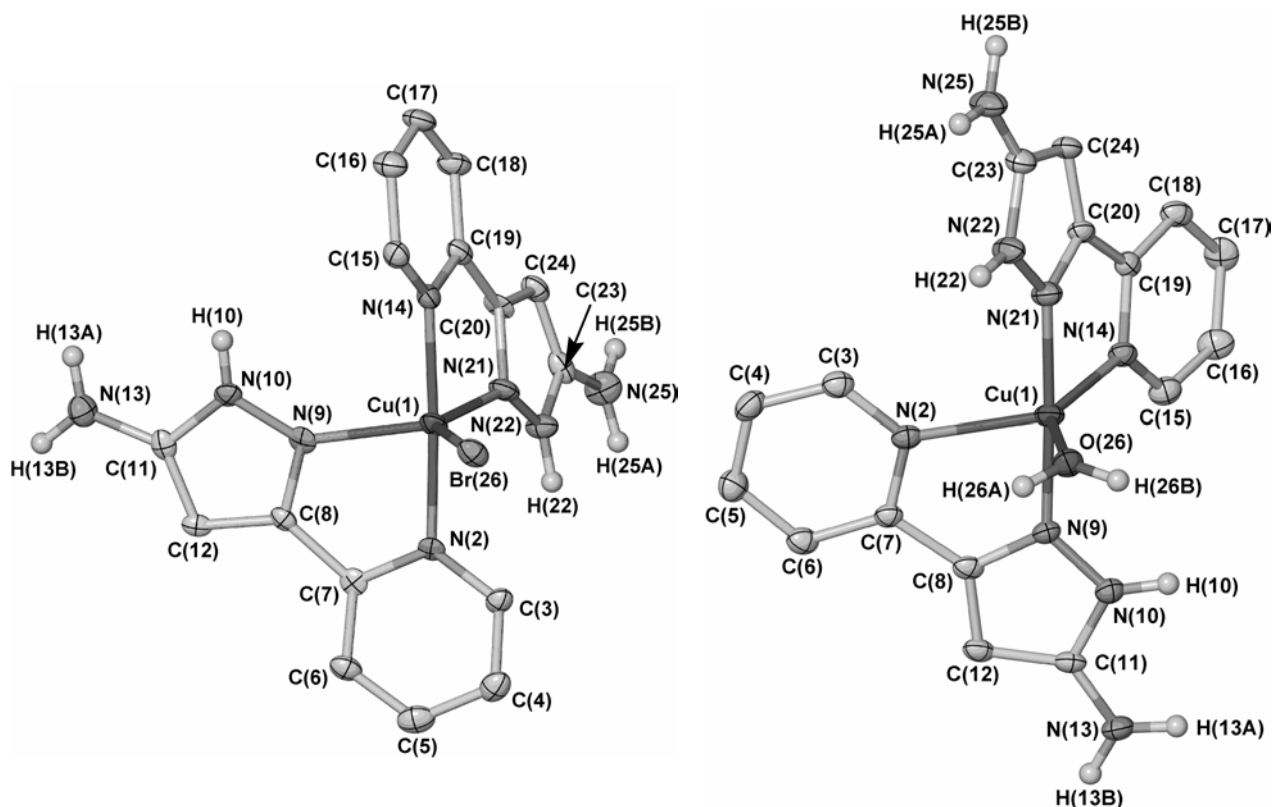

**Fig. S1** Views of the complex cations in the crystal structures of  $[\text{CuBrL}_2]\text{Br}\cdot\text{CH}_3\text{OH}$  (**1**, left) and  $[\text{Cu}(\text{OH}_2)_2\text{L}_2]\text{SO}_4\cdot\text{H}_2\text{O}\cdot\text{CH}_3\text{OH}$  (**2**, right), emphasising their different molecular structures. All C-bound H atoms have been omitted, and displacement ellipsoids are at the 35 % probability level.

**Table S1** Selected bond lengths and angles ( $\text{\AA}$ ,  $^\circ$ ) for  $[\text{CuBrL}_2]\text{Br}\cdot\text{CH}_3\text{OH}$  (**1**) and  $[\text{CuL}_2(\text{OH}_2)]\text{SO}_4\cdot\text{H}_2\text{O}\cdot\text{CH}_3\text{OH}$  (**2**).

| <i>T</i> (K)      | <b>1</b> (X = Br) | <b>2</b> (X = O) |
|-------------------|-------------------|------------------|
| Cu(1)–N(2)        | 1.996(8)          | 2.166(4)         |
| Cu(1)–N(9)        | 2.089(8)          | 1.942(4)         |
| Cu(1)–N(14)       | 1.998(8)          | 2.063(4)         |
| Cu(1)–N(21)       | 2.035(9)          | 1.939(4)         |
| Cu(1)–X(26)       | 2.5140(16)        | 2.068(3)         |
| N(2)–Cu(1)–N(9)   | 80.1(3)           | 78.54(15)        |
| N(2)–Cu(1)–N(14)  | 172.1(3)          | 121.22(14)       |
| N(2)–Cu(1)–N(21)  | 95.0(3)           | 99.08(15)        |
| N(2)–Cu(1)–X(26)  | 92.6(2)           | 100.19(13)       |
| N(9)–Cu(1)–N(14)  | 95.7(3)           | 96.30(15)        |
| N(9)–Cu(1)–N(21)  | 114.6(3)          | 173.76(16)       |
| N(9)–Cu(1)–X(26)  | 112.8(2)          | 94.91(14)        |
| N(14)–Cu(1)–N(21) | 80.6(3)           | 79.94(16)        |
| N(14)–Cu(1)–X(26) | 95.2(2)           | 138.46(14)       |
| N(21)–Cu(1)–X(26) | 132.6(2)          | 91.18(15)        |

**Table S2** Metric parameters for the hydrogen bond and  $\pi$ - $\pi$  interactions in [CuBrL<sub>2</sub>]Br·CH<sub>3</sub>OH (**1**) (Å, °). Symmetry codes correspond to those in Fig. 1 of the main paper.

| Hydrogen bonds <sup>a</sup>           | D–H  | H...A | D...A     | D–H...A |
|---------------------------------------|------|-------|-----------|---------|
| N(10)–H(10)...Br(27)                  | 0.88 | 2.43  | 3.263(8)  | 158.1   |
| N(13)–H(13A)...Br(27)                 | 0.88 | 2.90  | 3.642(9)  | 142.5   |
| N(13)–H(13B)...Br(26 <sup>i</sup> )   | 0.88 | 2.76  | 3.491(9)  | 141.6   |
| N(22)–H(22)...O(28)                   | 0.88 | 1.89  | 2.708(11) | 154.6   |
| N(25)–H(25A)...Br(27 <sup>ii</sup> )  | 0.88 | 3.05  | 3.776(9)  | 141.5   |
| N(25)–H(25B)...Br(26 <sup>iii</sup> ) | 0.88 | 2.76  | 3.510(9)  | 143.6   |
| O(28)–H(28)...Br(27 <sup>iv</sup> )   | 0.84 | 2.51  | 3.287(8)  | 155.2   |

  

| $\pi$ - $\pi$ Interactions <sup>a</sup>                                  | Interplanar distance | Dihedral angle | Centroid offset |
|--------------------------------------------------------------------------|----------------------|----------------|-----------------|
| [N(2)–N(13)]–[N(2 <sup>i</sup> )–N(13 <sup>i</sup> )]                    | 3.349(5)             | 0              | 2.84            |
| [N(14)–N(25)]–[N(14 <sup>iii</sup> )–N(25 <sup>iii</sup> )] <sup>b</sup> | 3.59(3)              | 7.2(2)         | 2.64            |

<sup>a</sup>Symmetry codes: (i)  $-x+2, -y+1, -z+1$ ; (ii)  $-x+2, y+1/2, -z+1/2$ ; (iii)  $x+1/2, y, -z+1/2$ ; (iv)  $-x+3/2, y+1/2, z$ . <sup>b</sup>Average value quoted for distance between atoms in one ring and the plane of the other, because dihedral angle between the interacting ligands  $\neq 0$ .

**Table S3** Metric parameters for the hydrogen bond and  $\pi$ - $\pi$  interactions in [CuL<sub>2</sub>(OH<sub>2</sub>)]SO<sub>4</sub>·H<sub>2</sub>O·CH<sub>3</sub>OH (**2**) (Å, °). Symmetry codes correspond to those in Fig. 2 of the main paper.

| Hydrogen bonds <sup>a</sup>          | D–H     | H...A   | D...A    | D–H...A |
|--------------------------------------|---------|---------|----------|---------|
| N(10)–H(10)...O(30 <sup>i</sup> )    | 0.88    | 1.95    | 2.779(5) | 155.5   |
| N(13)–H(13A)...O(29 <sup>i</sup> )   | 0.88    | 2.04    | 2.858(5) | 153.6   |
| N(13)–H(13B)...O(31 <sup>ii</sup> )  | 0.88    | 2.11    | 2.950(5) | 158.6   |
| N(22)–H(22)...O(28)                  | 0.88    | 2.05    | 2.841(5) | 148.4   |
| N(25)–H(25A)...O(31)                 | 0.88    | 2.44    | 3.251(6) | 153.0   |
| N(25)–H(25B)...O(28 <sup>iii</sup> ) | 0.88    | 2.32    | 3.116(6) | 151.2   |
| O(26)–H(26A)...O(33)                 | 0.85(3) | 1.86(3) | 2.707(5) | 175(5)  |
| O(26)–H(26B)...O(32 <sup>i</sup> )   | 0.85(3) | 1.85(3) | 2.662(5) | 158(5)  |
| O(32)–H(32A)...O(30)                 | 0.86(3) | 1.93(3) | 2.708(5) | 151(5)  |
| O(32)–H(32B)...O(31 <sup>iv</sup> )  | 0.84(3) | 1.89(3) | 2.735(5) | 176(5)  |
| O(33)–H(33)...O(29)                  | 0.84    | 1.92    | 2.750(5) | 169.0   |

  

| $\pi$ - $\pi$ Interaction <sup>a</sup>                        | Interplanar distance | Dihedral angle | Centroid offset |
|---------------------------------------------------------------|----------------------|----------------|-----------------|
| [N(14)–N(25)]–[N(14 <sup>viii</sup> )–N(25 <sup>viii</sup> )] | 3.348(10)            | 0              | 0.98            |

<sup>a</sup>Symmetry codes: (i)  $x-1/2, -y+1/2, z-1/2$ ; (ii)  $-x+1/2, y-1/2, -z+3/2$ ; (iii)  $-x+3/2, y+1/2, -z+3/2$ ; (iv)  $-x+2, -y+1, -z+2$ ; (viii)  $-x+1, -y+1, -z+1$ .

**Table S4** Connections making up the hydrogen-bonded network in [CuBrL<sub>2</sub>]Br·CH<sub>3</sub>OH (1).<sup>a</sup>

|                                                                                                                                                                                                                                                         | Distance between nodes (Å)                                               |
|---------------------------------------------------------------------------------------------------------------------------------------------------------------------------------------------------------------------------------------------------------|--------------------------------------------------------------------------|
| Cu...Cu pathways [ <i>via</i> the coordinated bromine atom Br(26)]                                                                                                                                                                                      |                                                                          |
| N(13)–H(13B)...Br(26 <sup>i</sup> )/N(13 <sup>i</sup> )–H(13B <sup>i</sup> )...Br(26) <sup>b</sup>                                                                                                                                                      | Cu(1)...Cu(1 <sup>i</sup> ) = 7.623(3)                                   |
| N(25)–H(25B)...Br(26 <sup>iii</sup> ) and N(25 <sup>vii</sup> )–H(25B <sup>vii</sup> )...Br(26)                                                                                                                                                         | Cu(1)...Cu(1 <sup>iii</sup> ) = Cu(1)...Cu(1 <sup>vii</sup> ) = 7.301(2) |
| Cu...Br pathways [to the non-coordinated bromine atom Br(27)]                                                                                                                                                                                           |                                                                          |
| N(10)–H(10)...Br(27)/N(13)–H(13A)...Br(27)                                                                                                                                                                                                              | Cu(1)...Br(27) = 5.5751(19)                                              |
| N(25)–H(25A)...Br(27 <sup>ii</sup> )                                                                                                                                                                                                                    | Cu(1)...Br(27 <sup>ii</sup> ) = 8.458(2)                                 |
| N(22)–H(22)...O(28)–H(28)...Br(27 <sup>iv</sup> )                                                                                                                                                                                                       | Cu(1)...Br(27 <sup>iv</sup> ) = 5.4041(19)                               |
| <sup>a</sup> Symmetry codes correspond to those in Fig. 1 of the main article: (i) $-x+2, -y+1, -z+1$ ; (ii) $-x+2, y+1/2, -z+1/2$ ; (iii) $x+1/2, y, -z+1/2$ ; (iv) $-x+3/2, y+1/2, z$ ; (vii) $x-1/2, y, -z+1/2$ . <sup>b</sup> Centrosymmetric pair. |                                                                          |

**Table S5** Connections making up the hydrogen-bonded network in [CuL<sub>2</sub>(OH<sub>2</sub>)]SO<sub>4</sub>·H<sub>2</sub>O·CH<sub>3</sub>OH (2).<sup>a</sup> There are two distinct hydrogen bond pathways linking Cu(1) with S(27) and S(27<sup>i</sup>).

|                                                                                                                                                                     | Distance between nodes (Å)                 |
|---------------------------------------------------------------------------------------------------------------------------------------------------------------------|--------------------------------------------|
| Cu...SO <sub>4</sub> pathways                                                                                                                                       |                                            |
| N(22)–H(22)...O(28)/N(25)–H(25A)...O(31)/O(26)–H(26A)...O(33)–H(33)...O(29)                                                                                         | Cu(1)...S(27) = 5.2754(14)                 |
| N(10)–H(10)...O(30 <sup>i</sup> )/N(13)–H(13A)...O(29 <sup>i</sup> )/<br>O(26)–H(26B)...O(32 <sup>i</sup> )–H(32A <sup>i</sup> )...O(30 <sup>i</sup> )              | Cu(1)...S(27 <sup>i</sup> ) = 5.4879(14)   |
| N(13)–H(13B)...O(31 <sup>ii</sup> )                                                                                                                                 | Cu(1)...S(27 <sup>ii</sup> ) = 8.3332(14)  |
| N(25)–H(25B)...O(28 <sup>iii</sup> )                                                                                                                                | Cu(1)...S(27 <sup>iii</sup> ) = 8.1360(14) |
| O(26)–H(26B)...O(32 <sup>i</sup> )–H(32B <sup>i</sup> )...O(31 <sup>vii</sup> )                                                                                     | Cu(1)...S(27 <sup>vii</sup> ) = 5.9073(14) |
| SO <sub>4</sub> ...SO <sub>4</sub> pathway                                                                                                                          |                                            |
| O(30)...H(32A)–O(32)–H(32B)...O(31 <sup>iv</sup> )/<br>O(30 <sup>iv</sup> )...H(32A <sup>iv</sup> )–O(32 <sup>iv</sup> )–H(32B <sup>iv</sup> )...O(31) <sup>b</sup> | S(27)...S(27 <sup>iv</sup> ) = 6.588(3)    |

<sup>a</sup>Symmetry codes correspond to those in Fig. 2 of the main article: (i)  $x-1/2, -y+1/2, z-1/2$ ; (ii)  $-x+1/2, y-1/2, -z+3/2$ ; (iii)  $-x+3/2, y+1/2, -z+3/2$ ; (iv)  $-x+2, -y+1, -z+2$ ; (vii)  $-x+3/2, -y+1/2, -z+3/2$ . <sup>b</sup>Centrosymmetric pair.

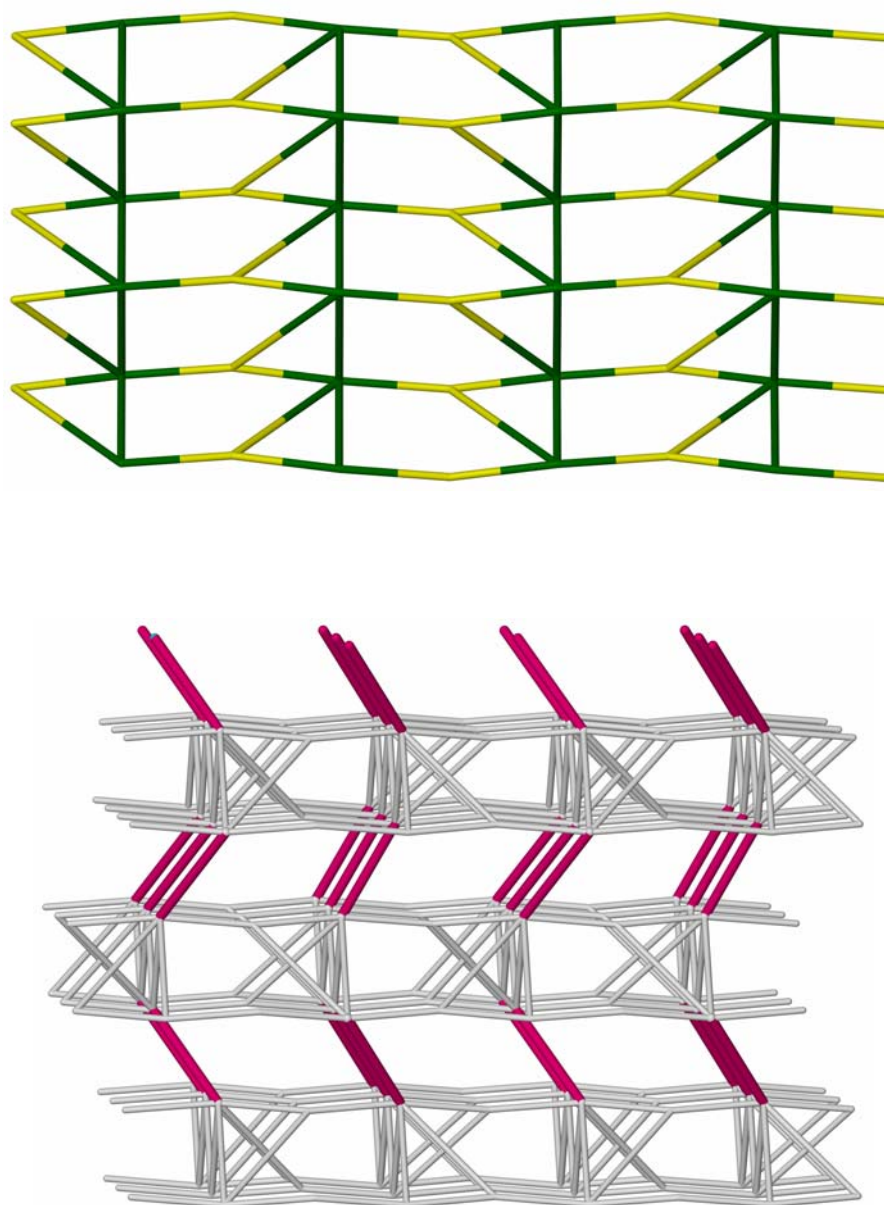

**Fig. S2** Two views of the topology of the hydrogen-bonded network in  $[\text{CuBrL}_2]\text{Br}\cdot\text{CH}_3\text{OH}$  (**1**), formed by the hydrogen bonds listed in Table S4. Top: Aggregation of the Cu (green) and Br (yellow) nodes into a zig-zag sheet along the (001) crystal plane, formed from  $\text{Cu}(1)\dots\text{Cu}(1^{\text{iii}})$  and the three  $\text{Cu}\dots\text{Br}$  contacts. Bottom: the linking of these sheets (white) into three dimensions by the  $\text{Cu}(1)\dots\text{Cu}(1^{\text{i}})$  connection (pink).

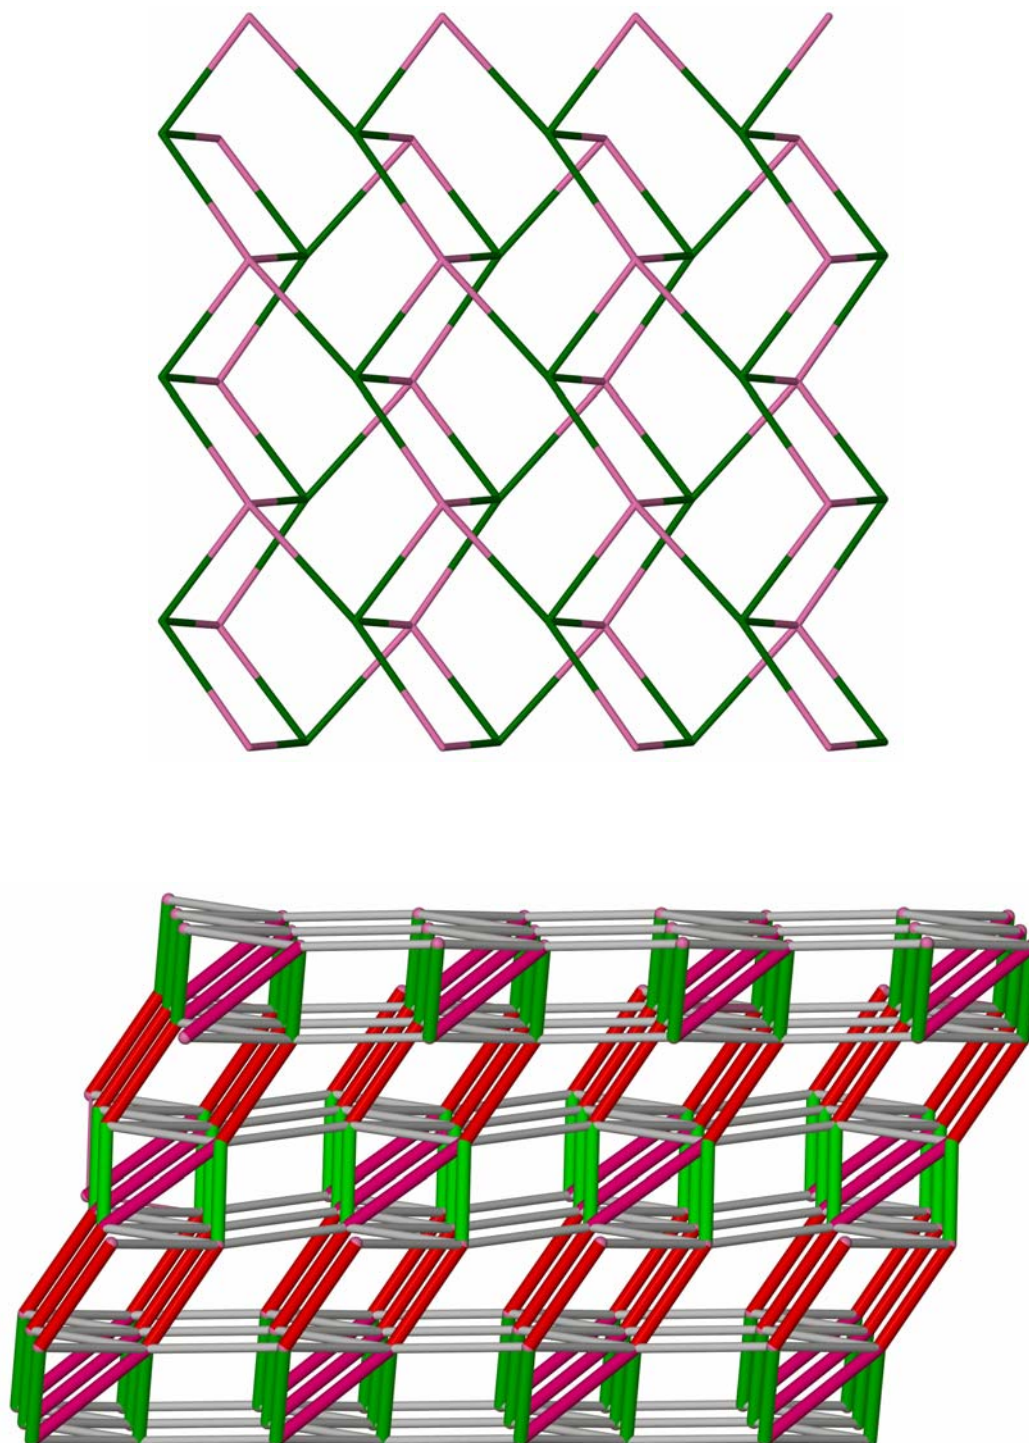

**Fig. S3** Two views of the topology of the extended hydrogen-bonded network in  $[\text{CuL}_2(\text{OH}_2)]\text{SO}_4 \cdot \text{H}_2\text{O} \cdot \text{CH}_3\text{OH}$  (**2**), formed by the hydrogen bonds listed in Table S5. Left: the bilayer of  $6^3$  sheets formed from the  $\text{Cu}(1)\dots\text{S}(27)$ ,  $\text{Cu}(1)\dots\text{S}(27^{\text{ii}})$ ,  $\text{Cu}(1)\dots\text{S}(27^{\text{iii}})$  and  $\text{Cu}(1)\dots\text{S}(27^{\text{vii}})$  hydrogen bond pathways, running along the (001) crystal plane. The Cu nodes are in green, and S nodes in pink. Right: the complete network, viewed approximately perpendicular to the (010) plane with the [100] crystal vector horizontal. The layers of  $6^3$  rings are in white, while the cross-linking pathways are  $\text{Cu}(1)\dots\text{S}(27)$  (red),  $\text{Cu}(1)\dots\text{S}(27^{\text{i}})$  (green) and  $\text{S}(27)\dots\text{S}(27^{\text{iv}})$  (pink).

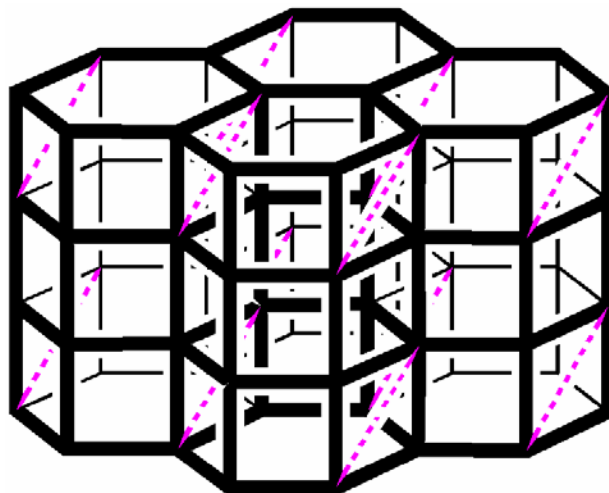

**Fig. S4** Diagram showing the relationship between the network topology for  $[\text{CuL}_2(\text{OH}_2)]\text{SO}_4 \cdot \text{H}_2\text{O} \cdot \text{CH}_3\text{OH}$  (**2**) in Fig. S3, and the boron nitride structure. The BN network is in black, while the additional  $\text{S}(27)\dots\text{S}(27^{\text{iv}})$  edge (pink in Fig. S3) found in **2** is shown in pink.
